# Supplementary material for: Thermally activated bipyridyl-based Mn-MOFs with Lewis acid–base bifunctional sites for highly efficient catalytic cycloaddition of CO2 with epoxides and Knoevenagel condensation reactions
Source: Royal Society of Chemistry journal article supplement (doi:10.1039/d3dt00043e), 2023-01-01
Supplement: d3dt00043e1.pdf [file d3dt00043e1.pdf]

**Thermally activated bipyridyl-based Mn-MOF with Lewis acid-base bifunctional sites for highly efficient catalytic cycloaddition of CO<sub>2</sub> with epoxides and Knoevenagel condensation reaction**

Zhen Xu,<sup>a</sup> Ya-Yu Zhao,<sup>a</sup> Le Chen,<sup>a</sup> Cai-Yong Zhu,<sup>a</sup> Peng Li,<sup>a</sup> Wei Gao,<sup>\*a</sup> Ji-Yang Li,<sup>b</sup> and Xiu-Mei Zhang<sup>\*a</sup>

**Table S1.** Selected bond lengths (Å) and angles (°) for Mn-MOF-1.

|             |          |             |          |
|-------------|----------|-------------|----------|
| Mn1-O3A     | 2.158(6) | O3B-Mn1-N1D | 90.6(2)  |
| Mn1-O3B     | 2.158(6) | O1-Mn1-N1D  | 89.6(2)  |
| Mn1-O1      | 2.173(6) | O1C-Mn1-N1D | 89.6(2)  |
| Mn1-O1C     | 2.173(6) | O3A-Mn1-O5  | 89.5(2)  |
| Mn1-N1D     | 2.246(9) | O3B-Mn1-O5  | 89.5(2)  |
| Mn1-O5      | 2.248(9) | O1-Mn1-O5   | 90.3(2)  |
| Mn2-O7      | 2.091(8) | O1C-Mn1-O5  | 90.3(2)  |
| Mn2-O4E     | 2.148(6) | N1D-Mn1-O5  | 179.9(3) |
| Mn2-O4F     | 2.148(6) | O7-Mn2-O4E  | 97.3(2)  |
| Mn2-O6      | 2.165(9) | O7-Mn2-O4   | 97.3(2)  |
| Mn2-O2C     | 2.282(6) | O4E-Mn2-O4F | 93.9(4)  |
| Mn2-O2      | 2.282(6) | O7-Mn2-O6   | 172.8(4) |
| O3-Mn1B     | 2.158(6) | O4E-Mn2-O6  | 87.6(3)  |
| O4-Mn2E     | 2.148(6) | O4F-Mn2-O6  | 87.6(3)  |
| N1-Mn1D     | 2.246(9) | O7-Mn2-O2C  | 87.9(2)  |
|             |          | O4E-Mn2-O2C | 172.2(2) |
| O3A-Mn1-O3B | 90.3(3)  | O4F-Mn2-O2C | 91.2(2)  |
| O3A-Mn1-O1  | 179.7(2) | O6-Mn2-O2C  | 86.7(3)  |
| O3B-Mn1-O1  | 89.5(2)  | O7-Mn2-O2   | 87.9(2)  |
| O3A-Mn1-O1C | 89.5(2)  | O4E-Mn2-O2  | 91.2(2)  |
| O3B-Mn1-O1C | 179.7(2) | O4F-Mn2-O2  | 172.2(2) |
| O1-Mn1-O1C  | 90.8(3)  | O6-Mn2-O2   | 86.7(3)  |

O3A-Mn1-N1D

90.6(2)

O2C-Mn2-O2

83.2(3)

Symmetry codes: A  $-x+1/2, y-1/2, -z+1$ ; B  $-x+1/2, -y+1/2, -z+1$ ; C  $x, -y, z$ ; D  $-x, -y, -z$ ; E  $-x+1/2, -y+1/2, -z+2$ ; F  $-x+1/2, y-1/2, -z+2$ .

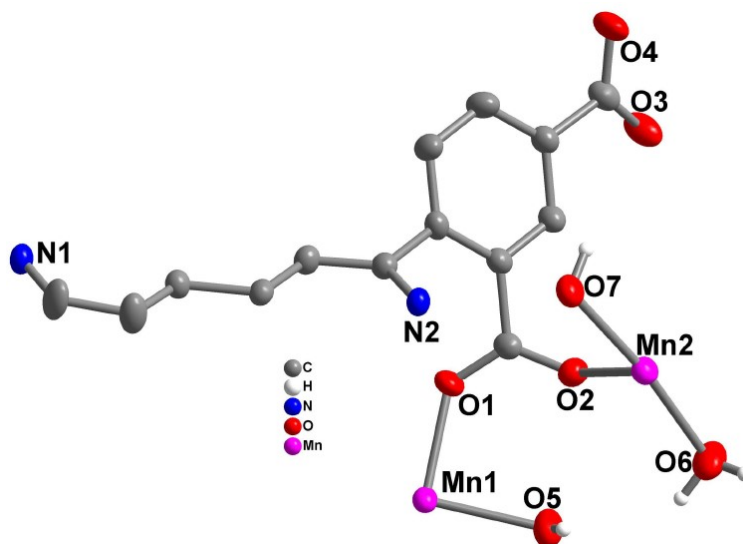

**Fig. S1** A view of asymmetric unit of Mn-MOF-1 with thermal ellipsoids drawn at the 50 % probability level.

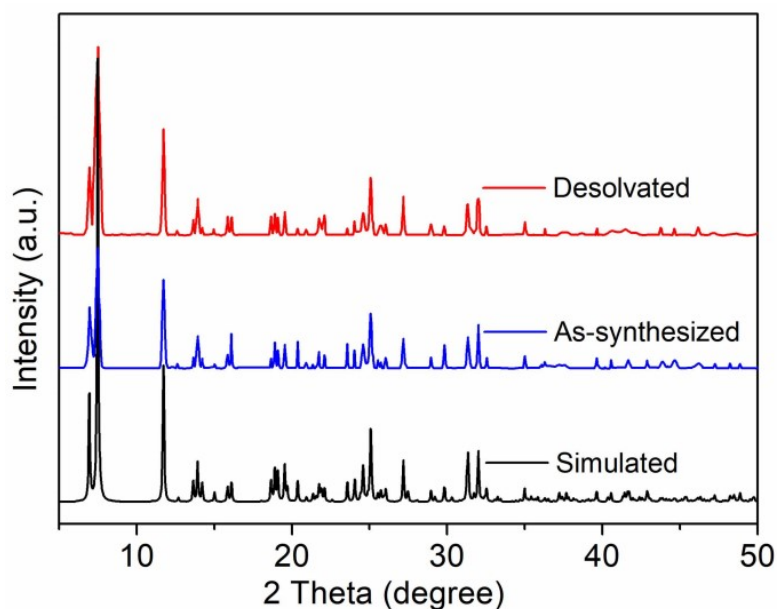

**Fig. S2** PXRD patterns of simulated, as-synthesized, and activated Mn-MOF-1.

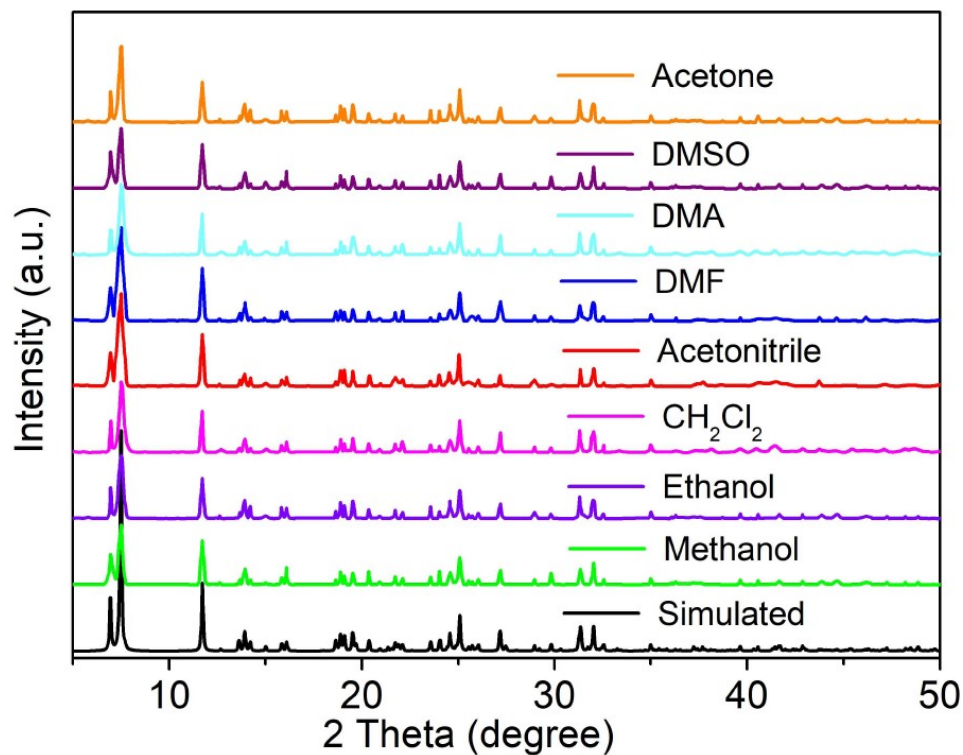

**Fig. S3** The PRXD patterns of Mn-MOF-1 samples immersed in different solvents and simulated crystal data.

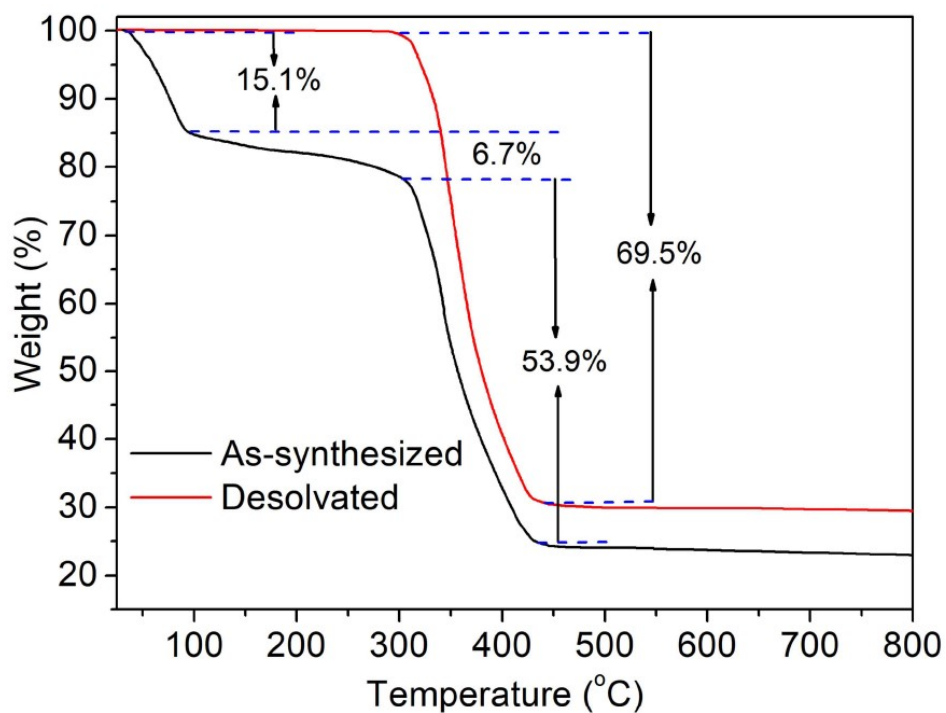

**Fig. S4** TGA spectra of as-synthesized and activated Mn-MOF-1

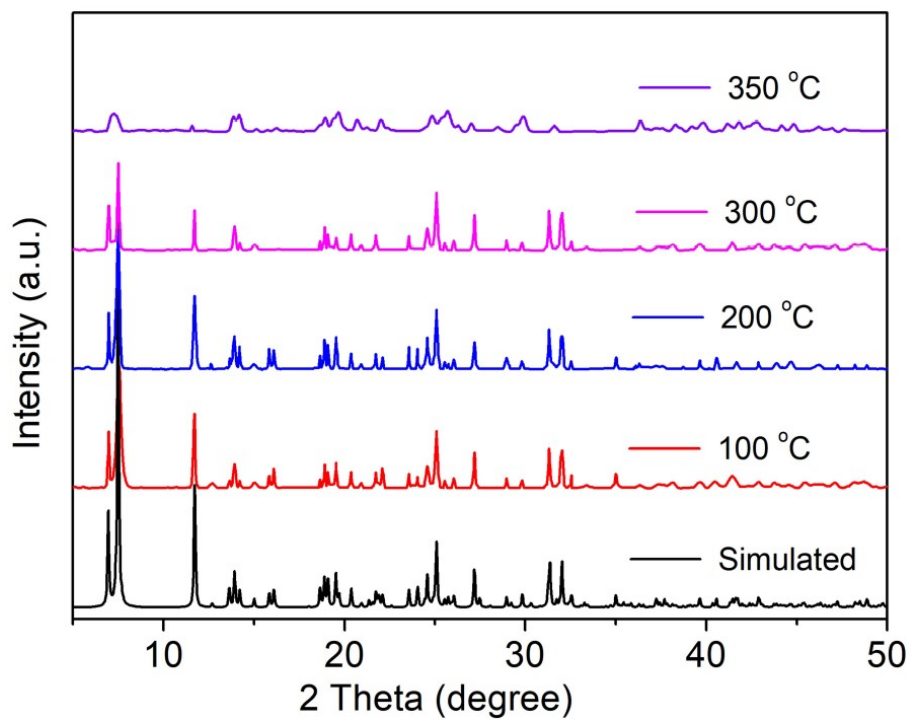

**Fig. S5** The PRXD patterns of Mn-MOF-1 samples heated in different temperature and simulated crystal data.

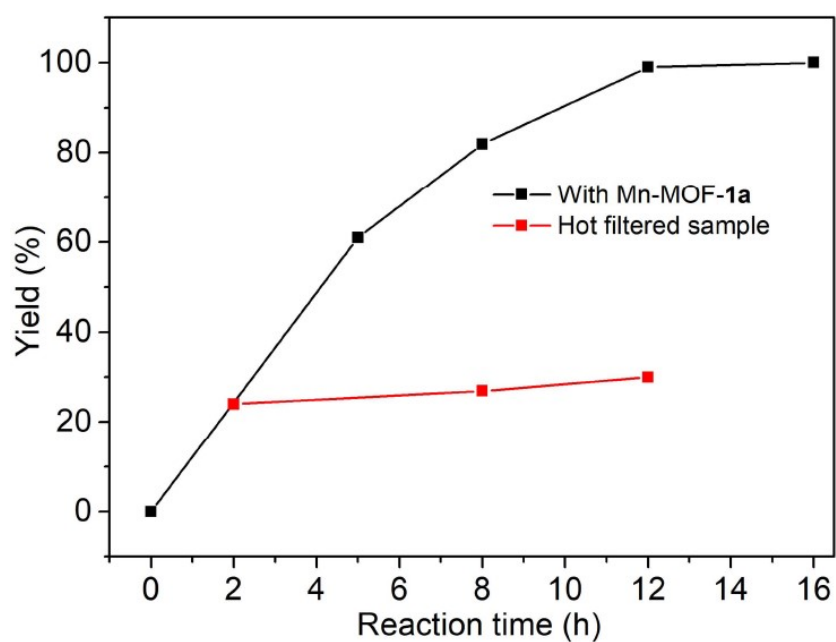

**Fig. S6** Filtration control test for the reaction for cycloadditions of epibromohydrin with CO<sub>2</sub>.

**Table S2** Comparison of Mn-MOF-1 with other MOF-based catalysts for the cycloaddition of CO<sub>2</sub> with epibromohydrin.

| Entry | Catalyst                                                                                                                            | Catalyst (mol %) <sup>a</sup> | n-Bu <sub>4</sub> NBr (mol %) | P (atm) | t (h) | T (°C) | Yield (%) | TON <sup>b</sup> | Refs      |
|-------|-------------------------------------------------------------------------------------------------------------------------------------|-------------------------------|-------------------------------|---------|-------|--------|-----------|------------------|-----------|
| 1     | {[Cd(Hbptc)]·H <sub>2</sub> O} <sub>n</sub>                                                                                         | 0.1                           | 1                             | 1       | 4     | 80     | 95        | 400              | S1        |
| 2     | [Zn <sub>2</sub> (TCA)(BIB) <sub>2.5</sub> ](NO <sub>3</sub> )                                                                      | 0.5                           | 1                             | 1       | 4     | 80     | 99        | 200              | S3        |
| 3     | {[(CH <sub>3</sub> ) <sub>2</sub> NH <sub>2</sub> ] <sub>2</sub> [CaZn(TDP)(H <sub>2</sub> O)]·3DMF·3H <sub>2</sub> O} <sub>n</sub> | 2                             | 5                             | 1       | 6     | 60     | 99        | 50               | S4        |
| 4     | {[Cu <sub>2</sub> (F-ptta)(H <sub>2</sub> O) <sub>2</sub> ]·5DMF·2H <sub>2</sub> O} <sub>n</sub>                                    | 0.3                           | 4                             | 1       | 8     | 60     | 99        | 330              | S5        |
| 5     | {[Zn(dibpca)(OAc)]·2.5H <sub>2</sub> O} <sub>n</sub>                                                                                | 0.1                           | 2.5                           | 1       | 48    | 25     | 90        | 900              | S7        |
| 6     | [Zn <sub>2</sub> (iso) <sub>2</sub> (bpy) <sub>2</sub> ] <sub>n</sub>                                                               | 0.41                          | 0.84                          | 2       | 2     | 80     | 98.2      | 244              | S8        |
| 7     | {2Cu(L)(A)·3H <sub>2</sub> O} <sub>n</sub>                                                                                          | 0.2                           | 6                             | 1       | 24    | 90     | 96        | 480              | S9        |
| 8     | [Zn(L)(bpa) <sub>0.5</sub> ] <sub>n</sub>                                                                                           | 1                             | 10                            | 1       | 6     | 40     | 99        | 100              | S10       |
| 9     | Mn-MOF-1                                                                                                                            | 0.38                          | 0.4                           | 4       | 12    | 80     | 99        | 266              | This work |

<sup>a</sup>Catalyst amount relative to the epoxide. <sup>b</sup>product (mmol)/catalyst (mmol).

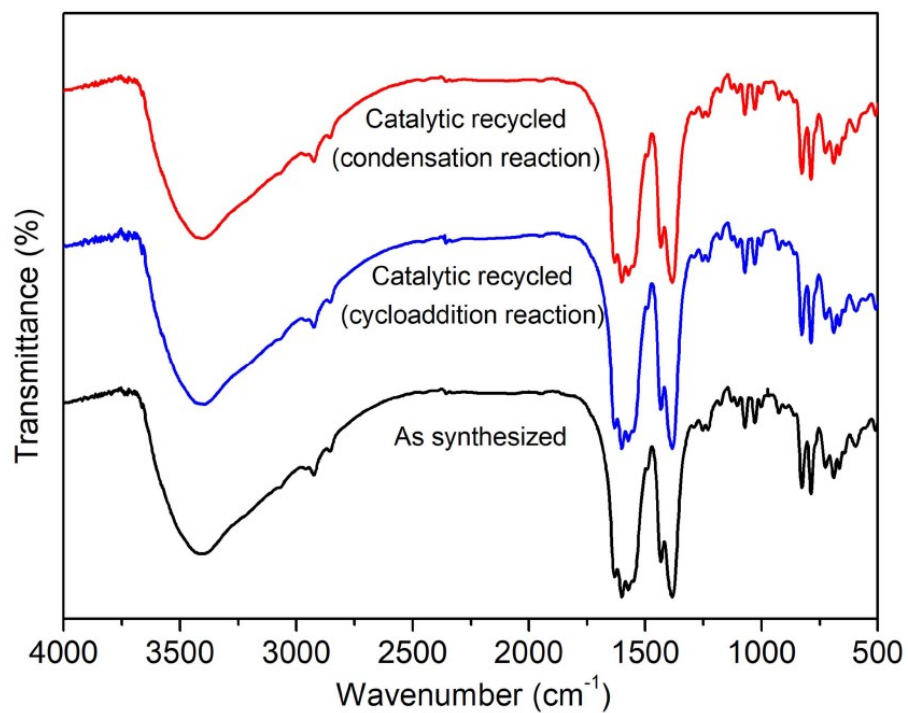

**Fig. S7** FT-IR spectra of Mn-MOF-1 catalyst before and after catalysis.

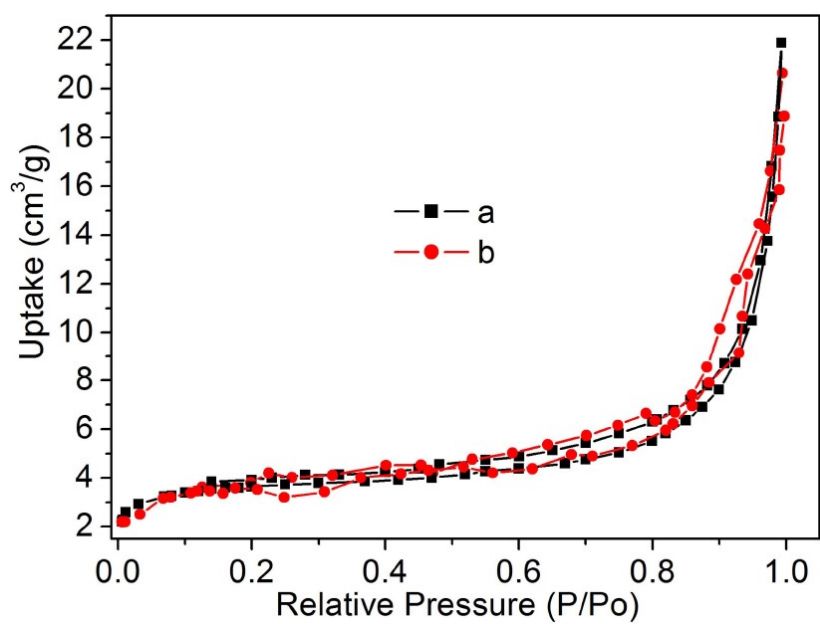

**Fig. S8**  $N_2$  adsorption-desorption isotherms of Mn-MOF-1a before (a) and after (b) catalytic cycloaddition of  $CO_2$  with epibromohydrin.

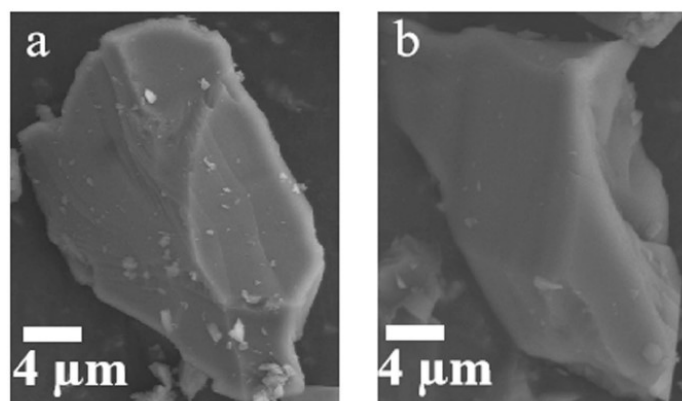

**Fig. S9** The SEM images of Mn-MOF-1 before (a) and after (b) catalytic cycloaddition of  $CO_2$  with epibromohydrin.

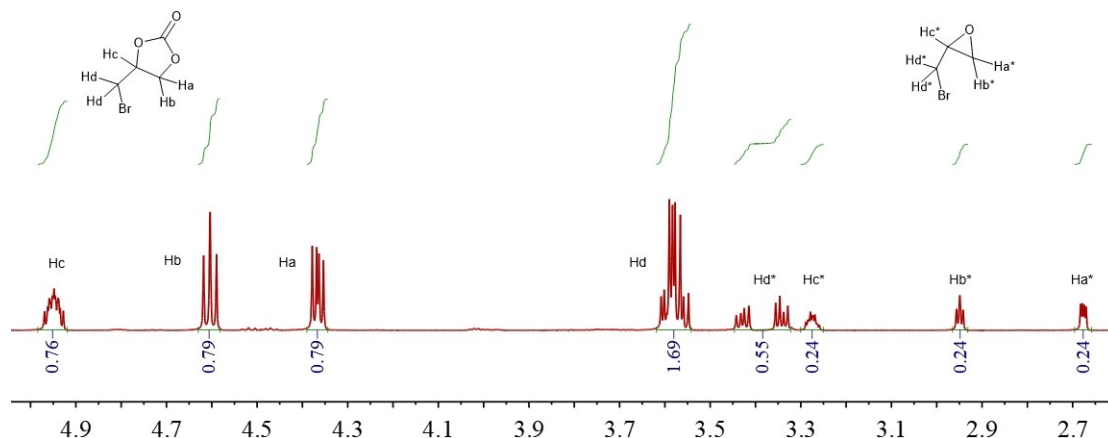

**Fig. S10** The comparison of  $^1\text{H}$  NMR spectra of epibromohydrin and its related catalytic product. (Yield: 76 % **Table 2** entry 8).

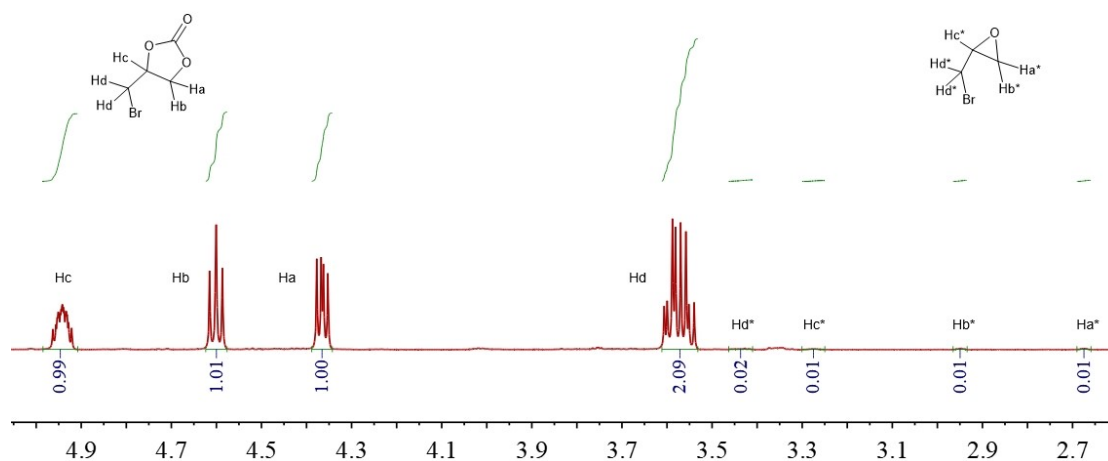

**Fig. S11** The comparison of  $^1\text{H}$  NMR spectra of epibromohydrin and its related catalytic product. (Yield: 99 % **Table 2** entry 9).

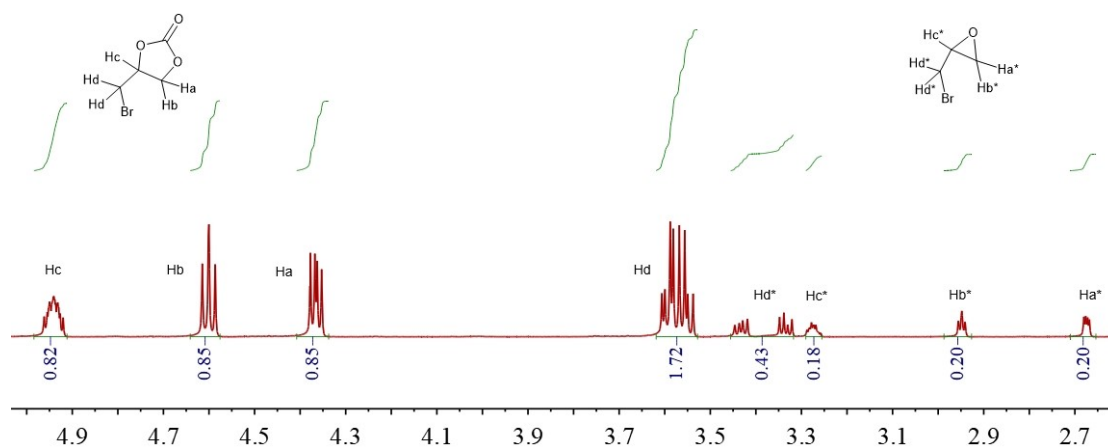

**Fig. S12** The comparison of  $^1\text{H}$  NMR spectra of epibromohydrin and its related catalytic product. (Yield: 82 % **Table 2** entry 12).

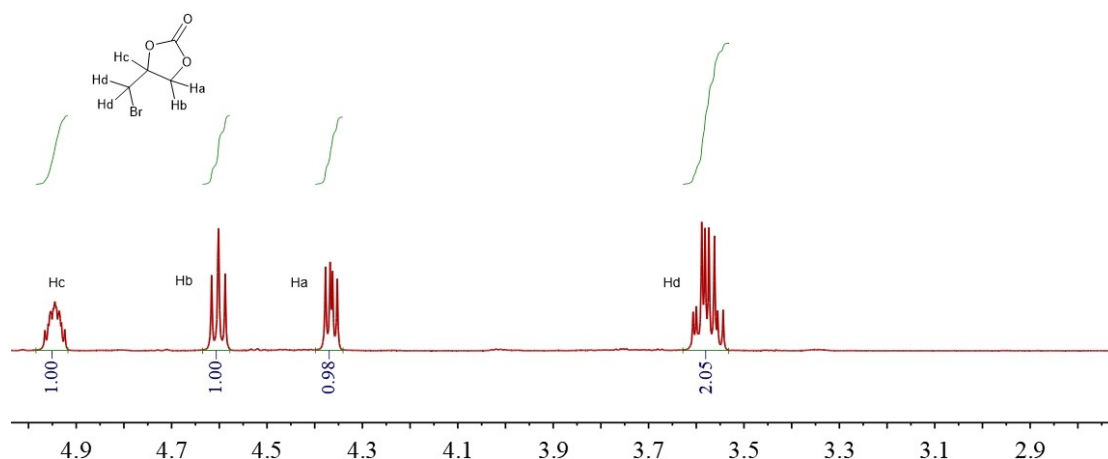

**Fig. S13** The comparison of  $^1\text{H}$  NMR spectra of epibromohydrin and its related catalytic product. (Yield: 100 % **Table 2** entry 13).

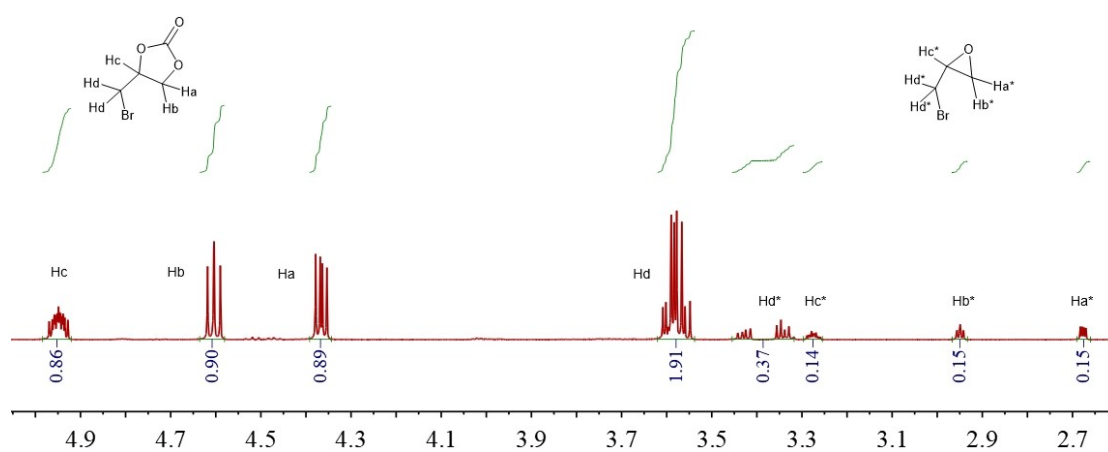

**Fig. S14** The comparison of  $^1\text{H}$  NMR spectra of epibromohydrin and its related catalytic product. (Yield: 86 % **Table 2** entry 14).

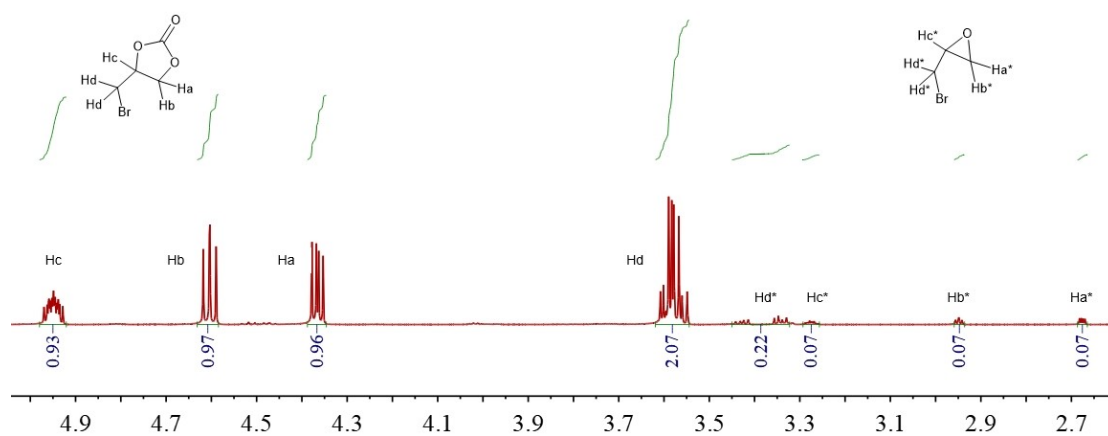

**Fig. S15** The comparison of  $^1\text{H}$  NMR spectra of epibromohydrin and its related catalytic product. (Yield: 93 % **Table 2** entry 15).



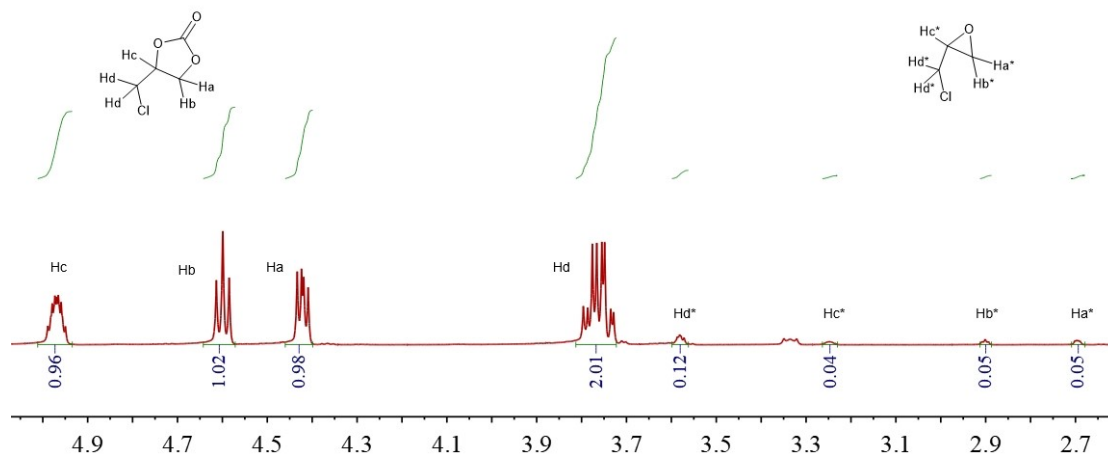

**Fig. S16** The comparison of  $^1\text{H}$  NMR spectra of epichlorohydrin and its related catalytic product. (Yield: 96 % **Table 3** entry 2).

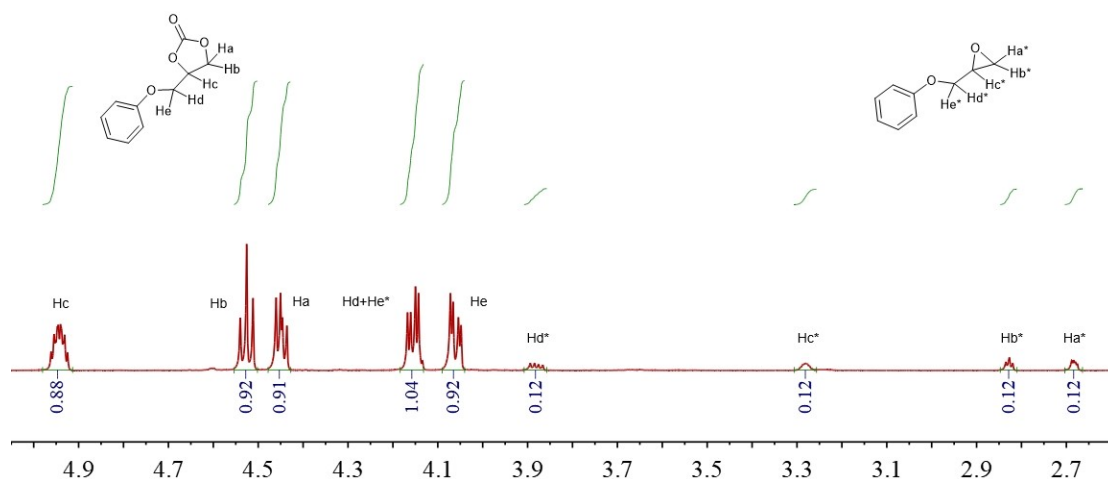

**Fig. S17** The comparison of  $^1\text{H}$  NMR spectra of phenyl glycidyl ether and its related catalytic product. (Yield: 88 % **Table 3** entry 3 for 12 h).

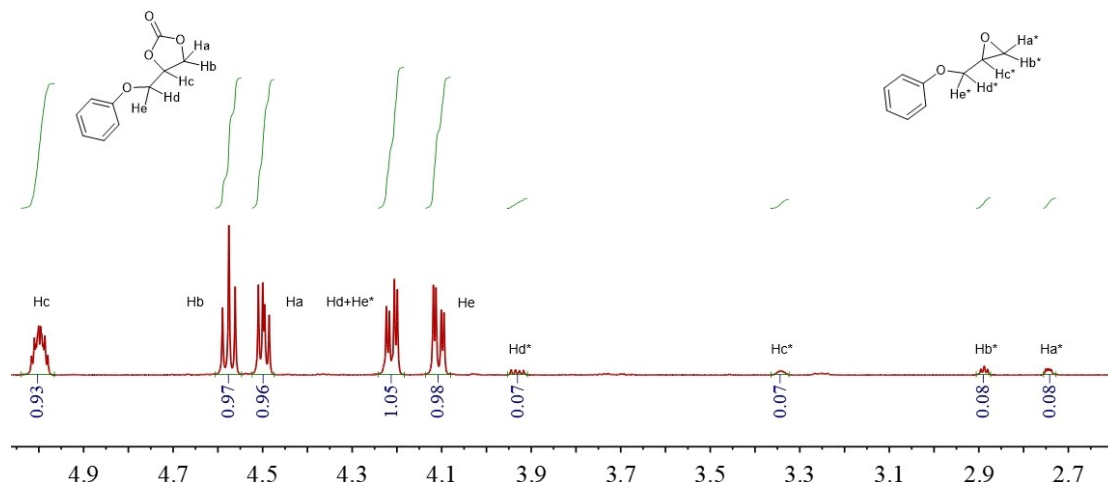

**Fig. S18** The comparison of  $^1\text{H}$  NMR spectra of phenyl glycidyl ether and its related catalytic product. (Yield: 93 % **Table 3** entry 3 for 16 h).

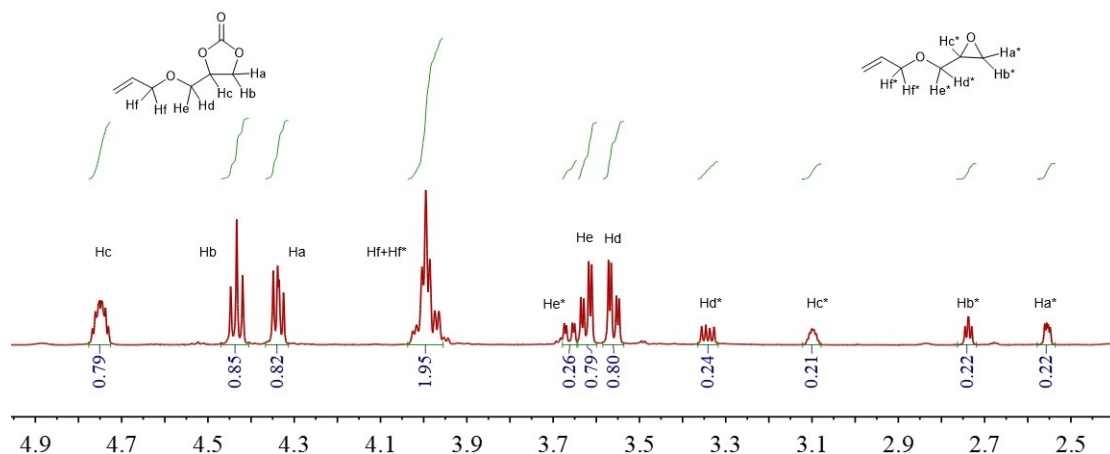

**Fig. S19** The comparison of  $^1\text{H}$  NMR spectra of allyl glycidyl ether and its related catalytic product. (Yield: 79 % **Table 3** entry 4 for 12 h).

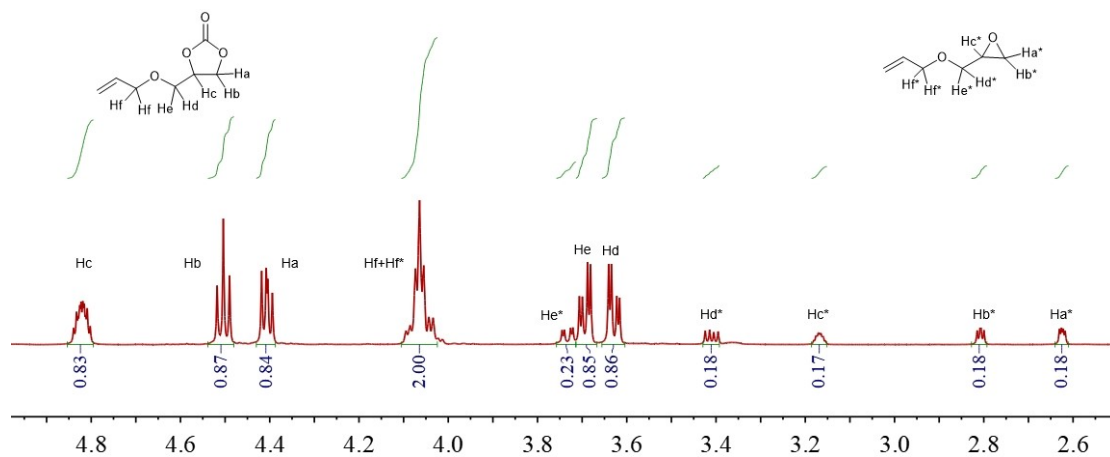

**Fig. S20** The comparison of  $^1\text{H}$  NMR spectra of allyl glycidyl ether and its related catalytic product. (Yield: 83 % **Table 3** entry 4 for 16 h).

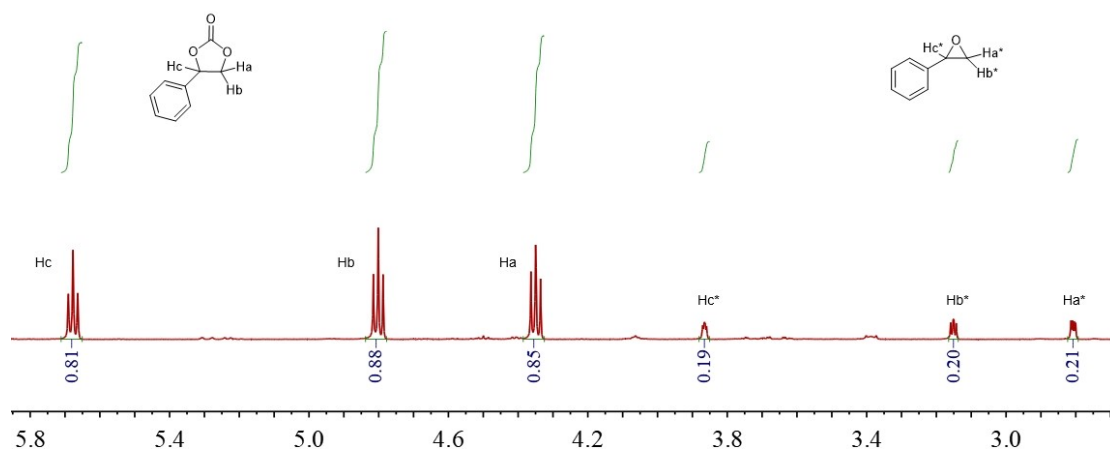

**Fig. S21** The comparison of  $^1\text{H}$  NMR spectra of styrene oxide and its related catalytic product. (Yield: 81 % **Table 3** entry 5 for 12 h).

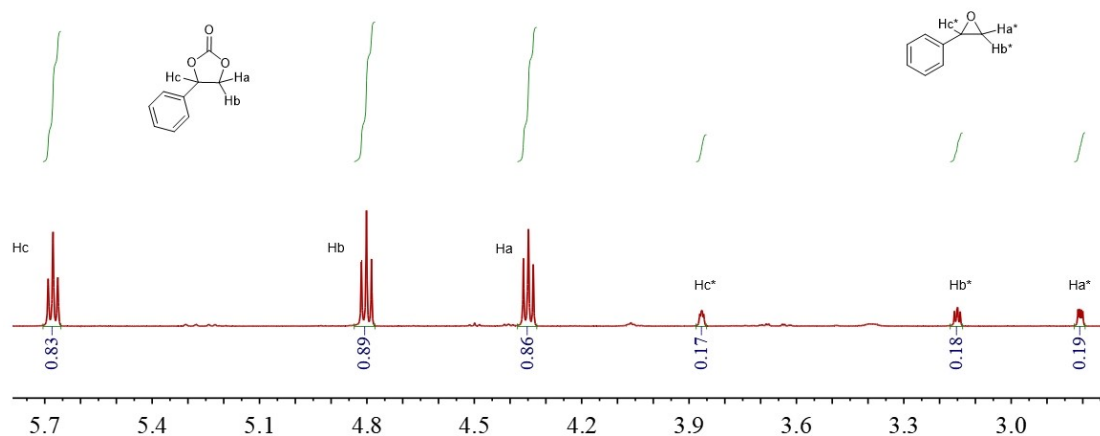

**Fig. S22** The comparison of  $^1\text{H}$  NMR spectra of styrene oxide and its related catalytic product. (Yield: 83 % **Table 3** entry 5 for 16 h).

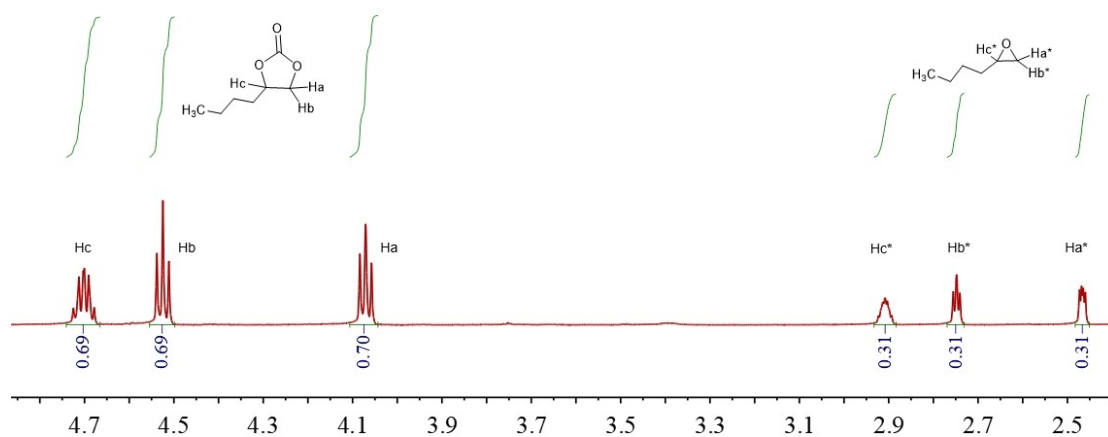

**Fig. S23** The comparison of  $^1\text{H}$  NMR spectra of epoxyhexane and its related catalytic product. (Yield: 69 % **Table 3** entry 6 for 12 h).

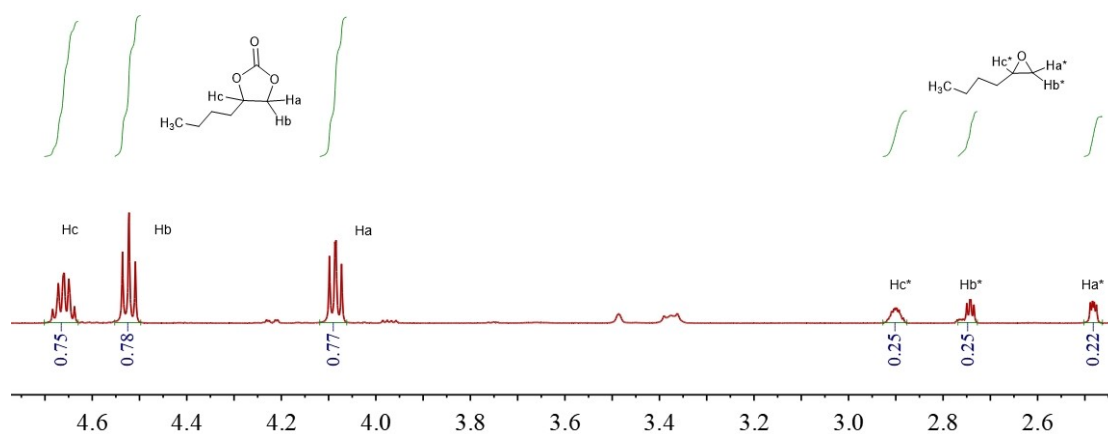

**Fig. S24** The comparison of  $^1\text{H}$  NMR spectra of epoxyhexane and its related catalytic product. (Yield: 75 % **Table 3** entry 6 for 16 h).

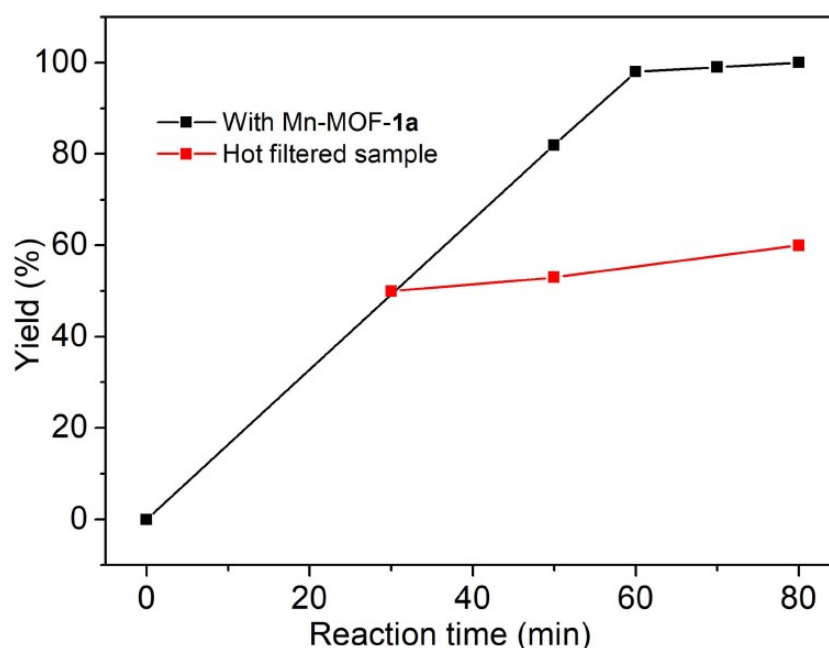

**Fig. S25** Filtration control test for the reaction for the Knoevenagel condensation reaction of benzaldehyde.

**Table S3** Comparison of the catalytic activity of various MOFs for the Knoevenagel condensation reaction of benzaldehyde.

| Entry | Catalyst                                                                                                                                                     | Catalyst (mol%) <sup>a</sup> | Solvent      | t(min) | T(°C) | Yield (%) | TON <sup>b</sup> | TOF <sup>c</sup> | Refs      |
|-------|--------------------------------------------------------------------------------------------------------------------------------------------------------------|------------------------------|--------------|--------|-------|-----------|------------------|------------------|-----------|
| 1     | {(Me <sub>2</sub> NH <sub>2</sub> ) <sub>2</sub> [Mn <sub>2</sub> (TDP)(H <sub>2</sub> O) <sub>2</sub> ]·3H <sub>2</sub> O·3DMF} <sub>n</sub>                | 0.3                          | Ethanol      | 60     | 60    | 99        | 330              | 5.5              | S9        |
| 2     | [Zn(bix)]{V <sub>2</sub> O <sub>6</sub> }                                                                                                                    | 1                            | Solvent-free | 60     | 60    | 99        | 100              | 1.67             | S10       |
| 3     | {[Ba <sub>3</sub> Zn <sub>4</sub> (TDP) <sub>2</sub> (HCO <sub>2</sub> ) <sub>2</sub> (OH <sub>2</sub> ) <sub>2</sub> ]·7DMF·4H <sub>2</sub> O} <sub>n</sub> | 0.3                          | Ethanol      | 60     | 60    | 99        | 330              | 5.5              | S11       |
| 4     | {[Cu <sub>2</sub> (μ <sub>3</sub> -pdba) <sub>2</sub> (2,2'-bipy)]·2H <sub>2</sub> O} <sub>n</sub>                                                           | 2                            | Methanol     | 60     | 25    | 99        | 50               | 0.83             | S12       |
| 5     | [Co <sub>2</sub> (bptc)(H <sub>2</sub> O) <sub>2</sub> ]·5DMA                                                                                                | 2                            | Solvent-free | 360    | 60    | 99.8      | 50               | 0.14             | S13       |
| 6     | Ni <sub>3</sub> (BTC) <sub>2</sub> (4-TPT) <sub>2</sub> (H <sub>2</sub> O) <sub>6</sub> ·1.5H <sub>2</sub> O                                                 | 0.25                         | DMF          | 360    | 25    | 87        | 348              | 0.97             | S14       |
| 7     | JNU-402-NH <sub>2</sub>                                                                                                                                      | 0.6                          | Solvent-free | 60     | 80    | 99        | 166              | 2.77             | S15       |
| 8     | [Zn <sub>2</sub> (BTC)] <sub>n</sub> ·3n(DMF)·2n(H <sub>2</sub> O)                                                                                           | 1                            | THF          | 120    | 25    | 94        | 94               | 0.78             | S16       |
| 9     | Hf-UiO-66-N <sub>2</sub> H <sub>3</sub>                                                                                                                      | 0.74                         | Ethanol      | 240    | 25    | 98        | 132.4            | 0.55             | S17       |
| 10    | Mn-MOF-1                                                                                                                                                     | 0.75                         | Ethanol      | 80     | 25    | 99        | 133.3            | 1.67             | This work |

<sup>a</sup>Catalyst amount relative to the benzaldehyde. <sup>b</sup>product (mmol)/catalyst (mmol). <sup>c</sup>product (mmol)/catalyst (mmol) / t (min).

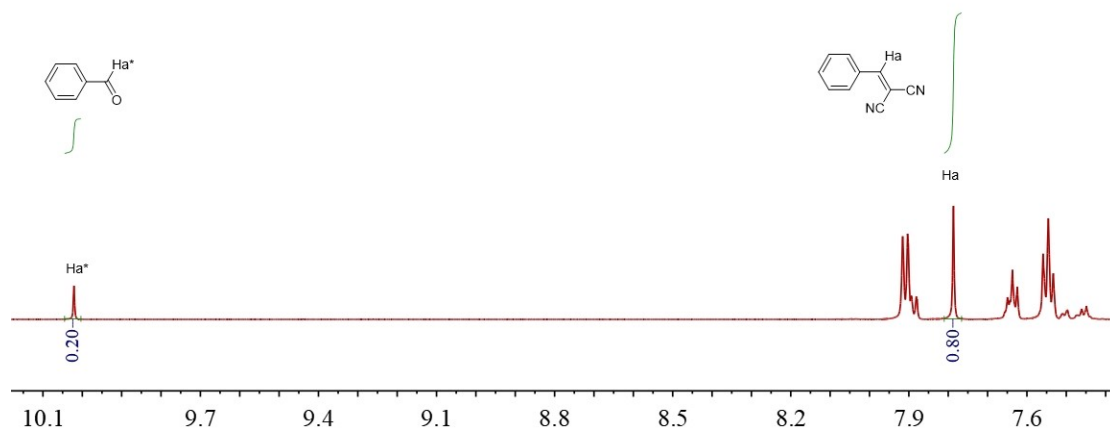

**Fig. S26** The comparison of <sup>1</sup>H NMR spectra of benzaldehyde and its related catalytic product. (Yield: 80 % **Table 4** entry 2).

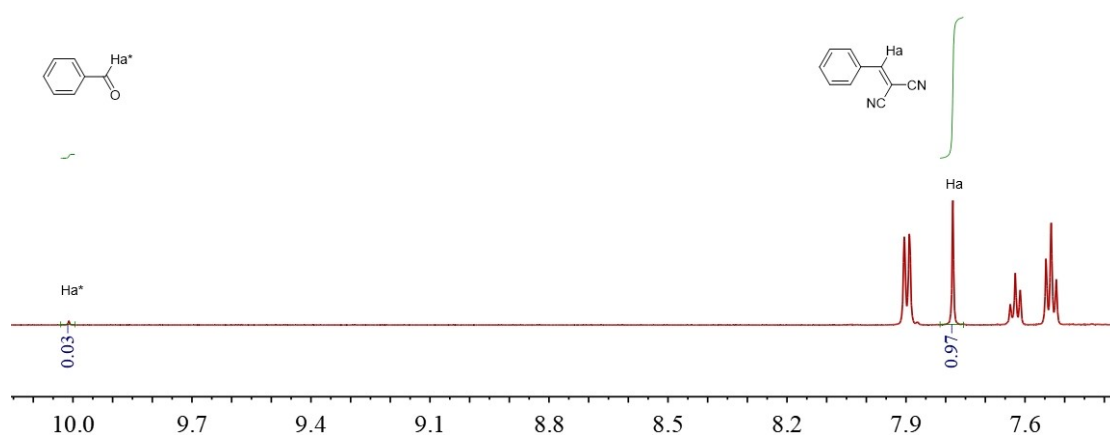

**Fig. S27** The comparison of <sup>1</sup>H NMR spectra of benzaldehyde and its related catalytic product. (Yield: 97 % **Table 4** entry 3).

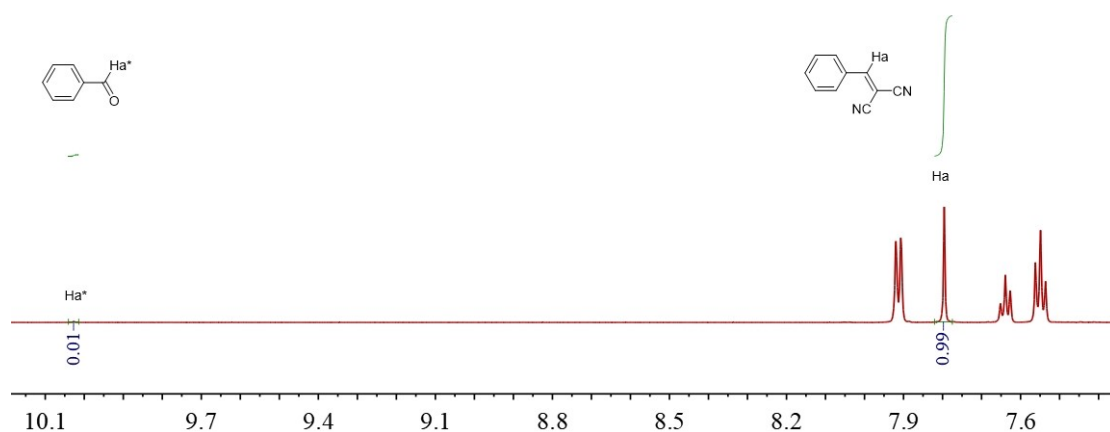

**Fig. S28** The comparison of <sup>1</sup>H NMR spectra of benzaldehyde and its related catalytic product. (Yield: 99 % **Table 4** entry 4).

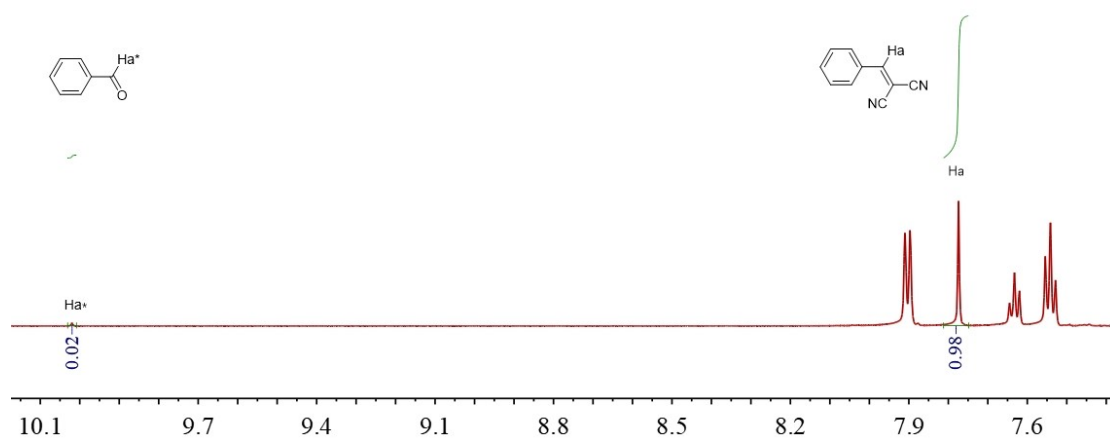

**Fig. S29** The comparison of <sup>1</sup>H NMR spectra of benzaldehyde and its related catalytic product. (Yield: 98 % **Table 4** entry 5).

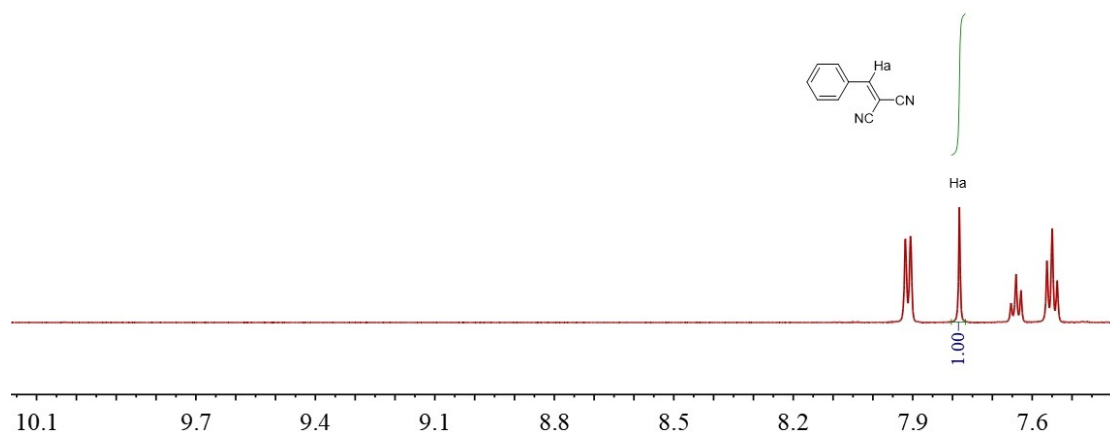

**Fig. S30** The comparison of <sup>1</sup>H NMR spectra of benzaldehyde and its related catalytic product. (Yield: 100 % **Table 4** entry 8).

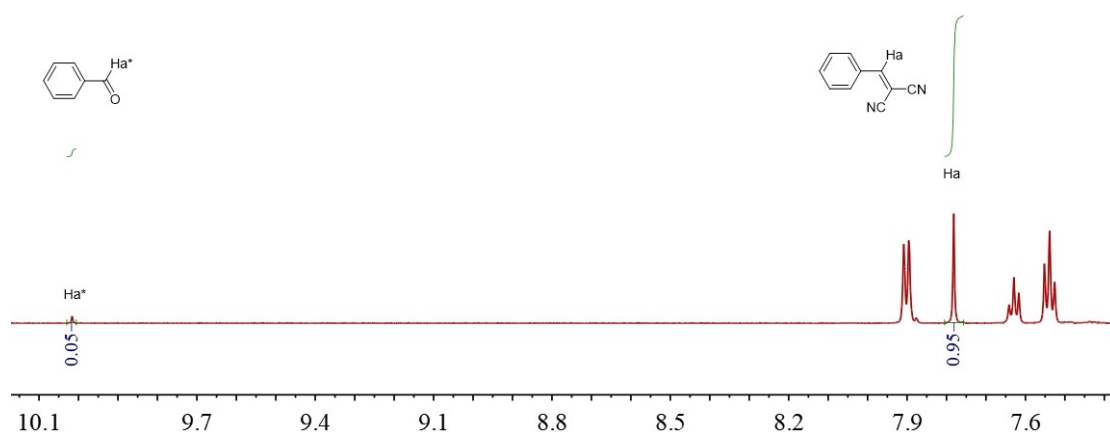

**Fig. S31** The comparison of <sup>1</sup>H NMR spectra of benzaldehyde and its related catalytic product. (Yield: 95 % **Table 4** entry 9).

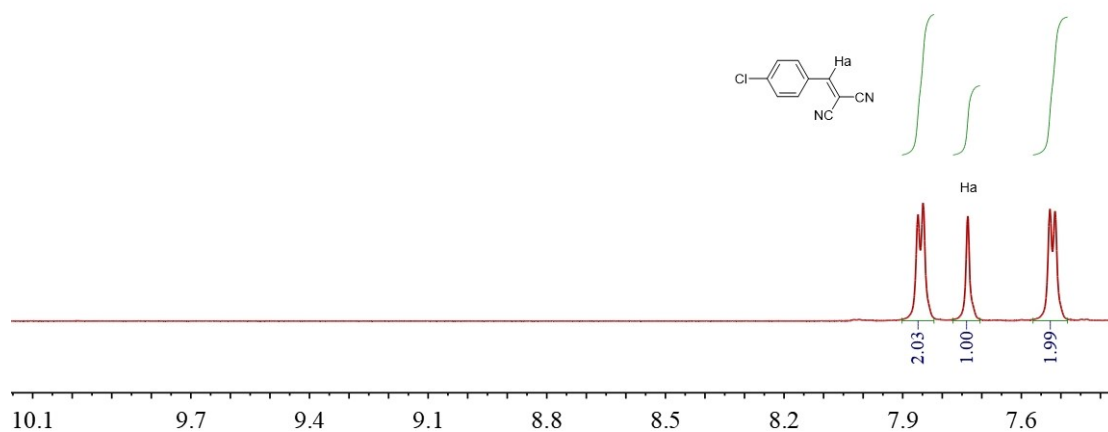

**Fig. S32** The comparison of  $^1\text{H}$  NMR spectra of 4-chlorobenzaldehyde and its related catalytic product. (Yield: >99 % **Table 5** entry 2).

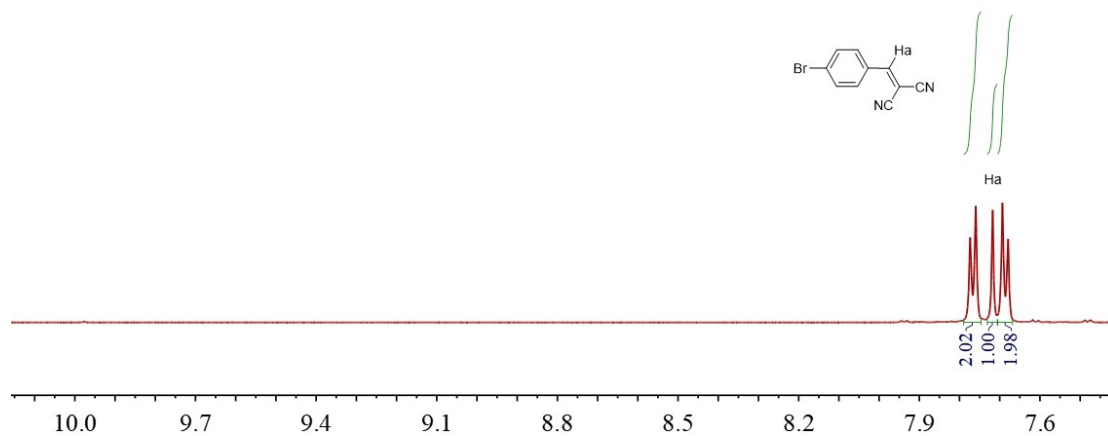

**Fig. S33** The comparison of  $^1\text{H}$  NMR spectra of 4-bromobenzaldehyde and its related catalytic product. (Yield: >99 % **Table 5** entry 3).

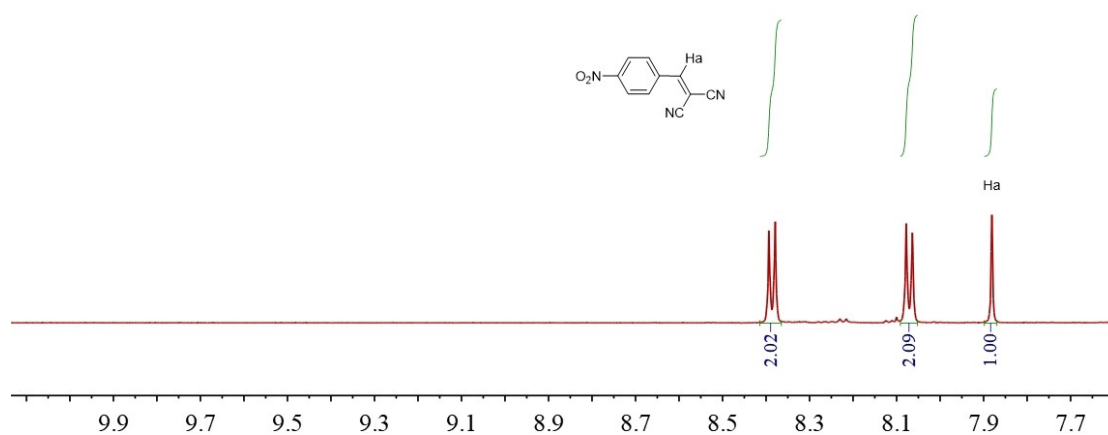

**Fig. S34** The comparison of  $^1\text{H}$  NMR spectra of 4-nitrobenzaldehyde and its related catalytic product. (Yield: >99 % **Table 5** entry 4).

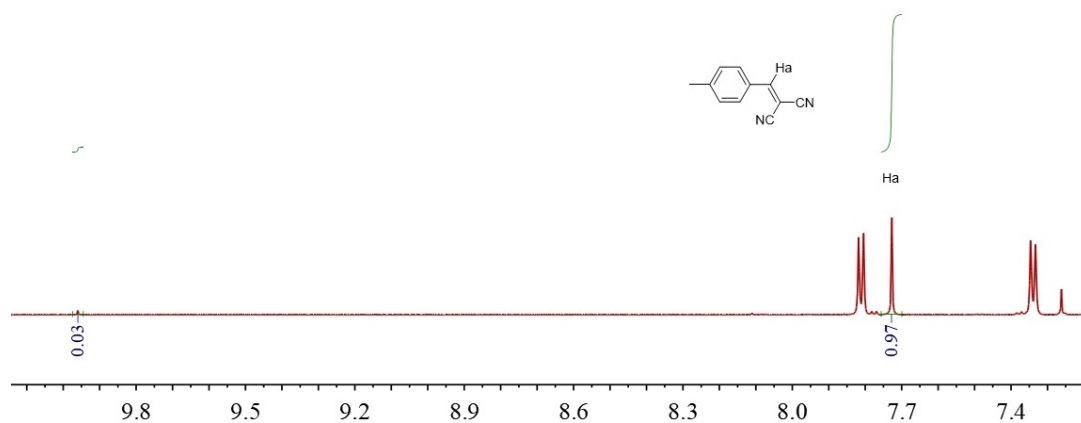

**Fig. S35** The comparison of <sup>1</sup>H NMR spectra of 4-methylbenzaldehyde and its related catalytic product. (Yield: 97 % **Table 5** entry 5).

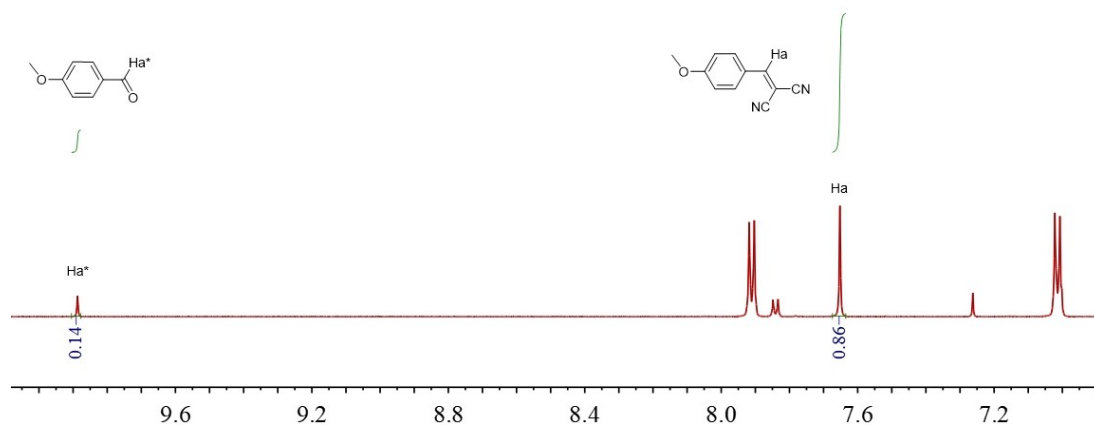

**Fig. S36** The comparison of <sup>1</sup>H NMR spectra of 4-methoxybenzaldehyde and its related catalytic product. (Yield: 86 % **Table 5** entry 6).

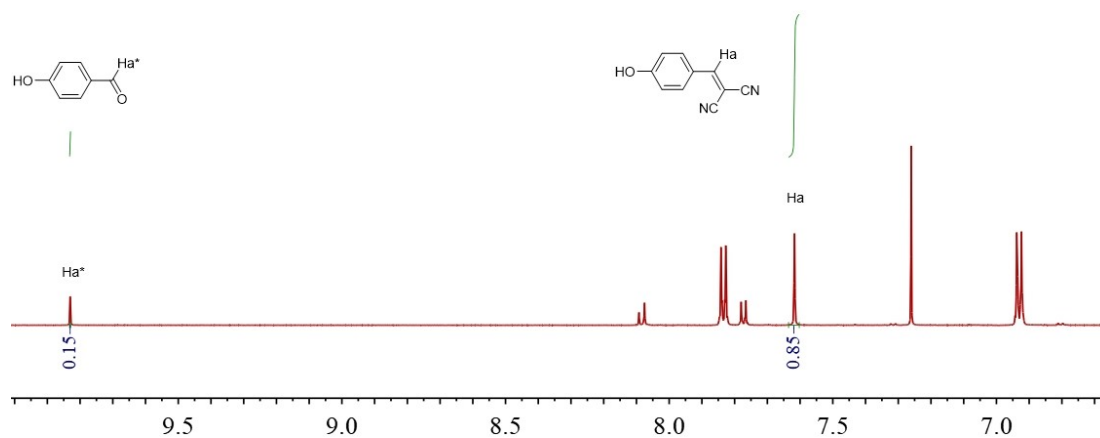

**Fig. S37** The comparison of <sup>1</sup>H NMR spectra of 4-hydroxybenzaldehyde and its related catalytic product. (Yield: 85 % **Table 5** entry 7).



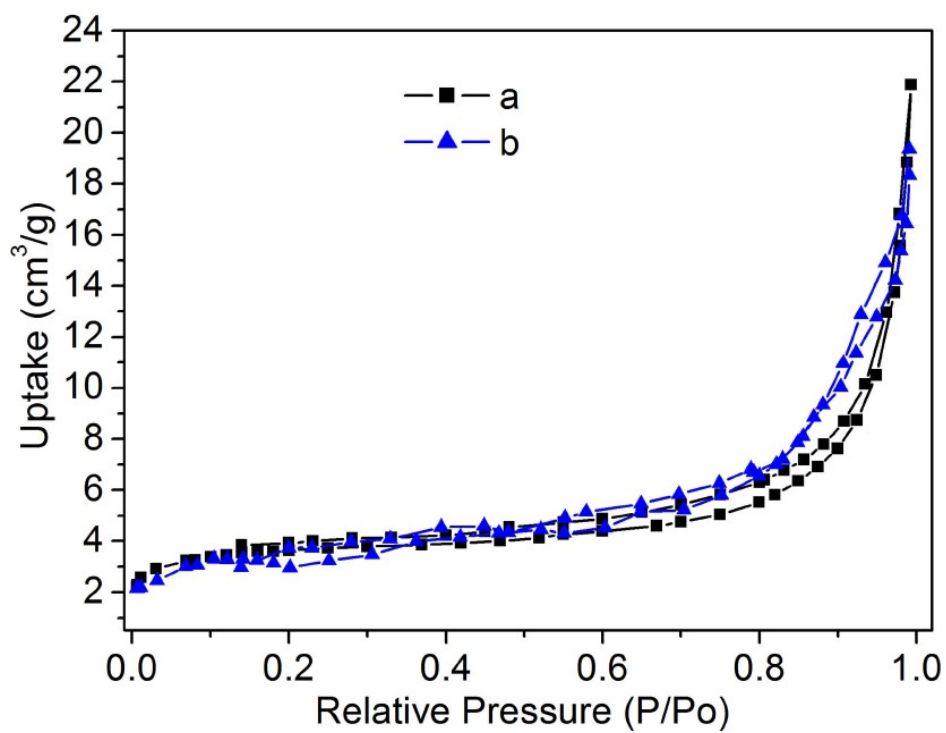

**Fig. S38** N<sub>2</sub> adsorption isotherms of Mn-MOF-1a before (a) and after (b) catalytic Knoevenagel condensation reaction of benzaldehyde.

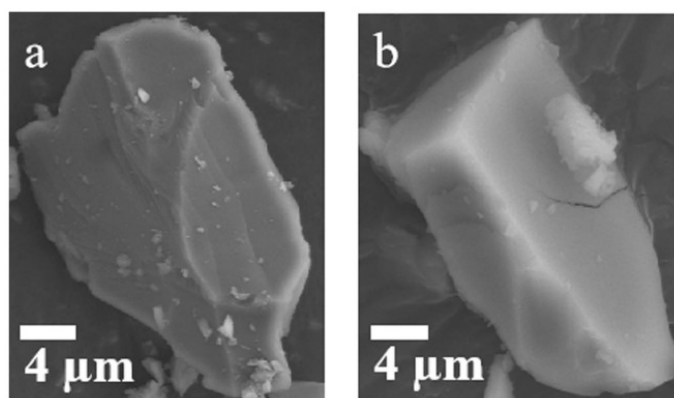

**Fig. S39** The SEM images of Mn-MOF-1 before (a) and after (b) catalytic Knoevenagel condensation reaction of benzaldehyde.

## References:

- S1 Y. Wang, G. P. Yang, P. F. Zhang, L. L. Ma, J. M. Wang, G. P. Li and Y. Y. Wang, *Cryst. Growth Des.*, 2021, **21**, 2734-2743.
- S2 C. Yao, S. L. Zhou, X. J. Kang, Y. Zhao, R. Yan, Y. Zhang and L. L. Wen, *Inorg. Chem.*, 2018, **57**, 11157-11164.
- S3 H. T. Chen, L. M. Fan and X. T. Zhang, *ACS Appl. Mater. Interfaces.*, 2020, **12**, 54884-54892.
- S4 H. T. Chen, T. Zhang, S. R. Liu, H. X. Lv, L. M. Fan and X. T. Zhang, *Inorg. Chem.*, 2022, **61**, 11949-11958.
- S5 H. J. Li, X. Y. Zhang, K. Huang and D. B. Qin, *Polyhedron*, 2022, **220**, 115850.
- S6 J. Zhang, M. Zou, Q. Li, W. L. Dai, D. Wang, S. Q. Zhang, B. Li, L. X. Yang, S. L. Luo and X. B. Luo, *Appl. Surf. Sci.*, 2022, **572**, 151408.
- S7 K. Huang, Q. Li, X. Y. Zhang, D. B. Qin and B. Zhao, *Cryst. Growth Des.*, 2022, **22**, 6531-6538.
- S8 Y. H. Chai, Y. Zhao, X. Y. Liu, Z. Y. Cui, B. T. Zhao and L. F. Ma, *Cryst. Growth Des.*, 2022, **22**, 5559-5570.
- S9 H. T. Chen, L. M. Fan, T. P. Hu and X. T. Zhang, *Inorg. Chem.*, 2021, **60**, 7276-7283.
- S10 H. R. Tian, S. M. Liu, Z. Zhang, T. Y. Dang, Y. Lu and S. X. Liu, *ACS Sustain. Chem. Eng.*, 2021, **9**, 4660-4667.
- S11 H. T. Chen, L. M. Fan, T. P. Hu and X. T. Zhang, *Inorg. Chem.*, 2021, **60**, 3384-3392.
- S12 X. Y. Cheng, L. R. Guo, H. Y. Wang, J. Z. Gu, Y. Yang, M. V. Kirillova and A. M. Kirillov, *Inorg. Chem.*, 2022, **61**, 17951-17962.

- S13 J. B. Deng, X. Wang, Z. Q. Ni and F. Zhu, *Arab. J. Chem.*, 2022, **13**, 7482-7489.
- S14 Y. Y. Zhang, Q. Liu, L. Y. Zhang, Y. M. Bao, J. Y. Tan, N. Zhang, J. Y. Zhang and Z. J. Liu, *Dalton. Trans.*, 2021, **50**, 647-659.
- S15 G. Q. Huang, J. Chen, Y. L. Huang, K. W. D. Luo, J. K. Jin, J. Zheng, S. H. Xu and W. G. Lu, *Inorg. Chem.*, 2022, **61**, 8339-8348.
- S16 A. Paul, L. M. D. R. S. Martins, A. Karmakar, M. L. Kuznetsov, A. S. Novikov, M. F. C. G. D. Silva and A. J. L. Pombeiro, *J. Catal.*, 2020, **385**, 324-337.
- S17 A. Das, N. Anbu, A. Dhakshinamoorthy and S. Biswas, *Microp. Mesop. Mater.*, 2019, **284**, 459-467.
